# Supplementary material for: Identification and Validation of New Alleles of FALSIFLORA and COMPOUND INFLORESCENCE Genes Controlling the Number of Branches in Tomato Inflorescence
Source: MDPI journal article supplement (doi:10.3390/ijms18071572), 2017-07-20
Supplement: s1 [file s1]

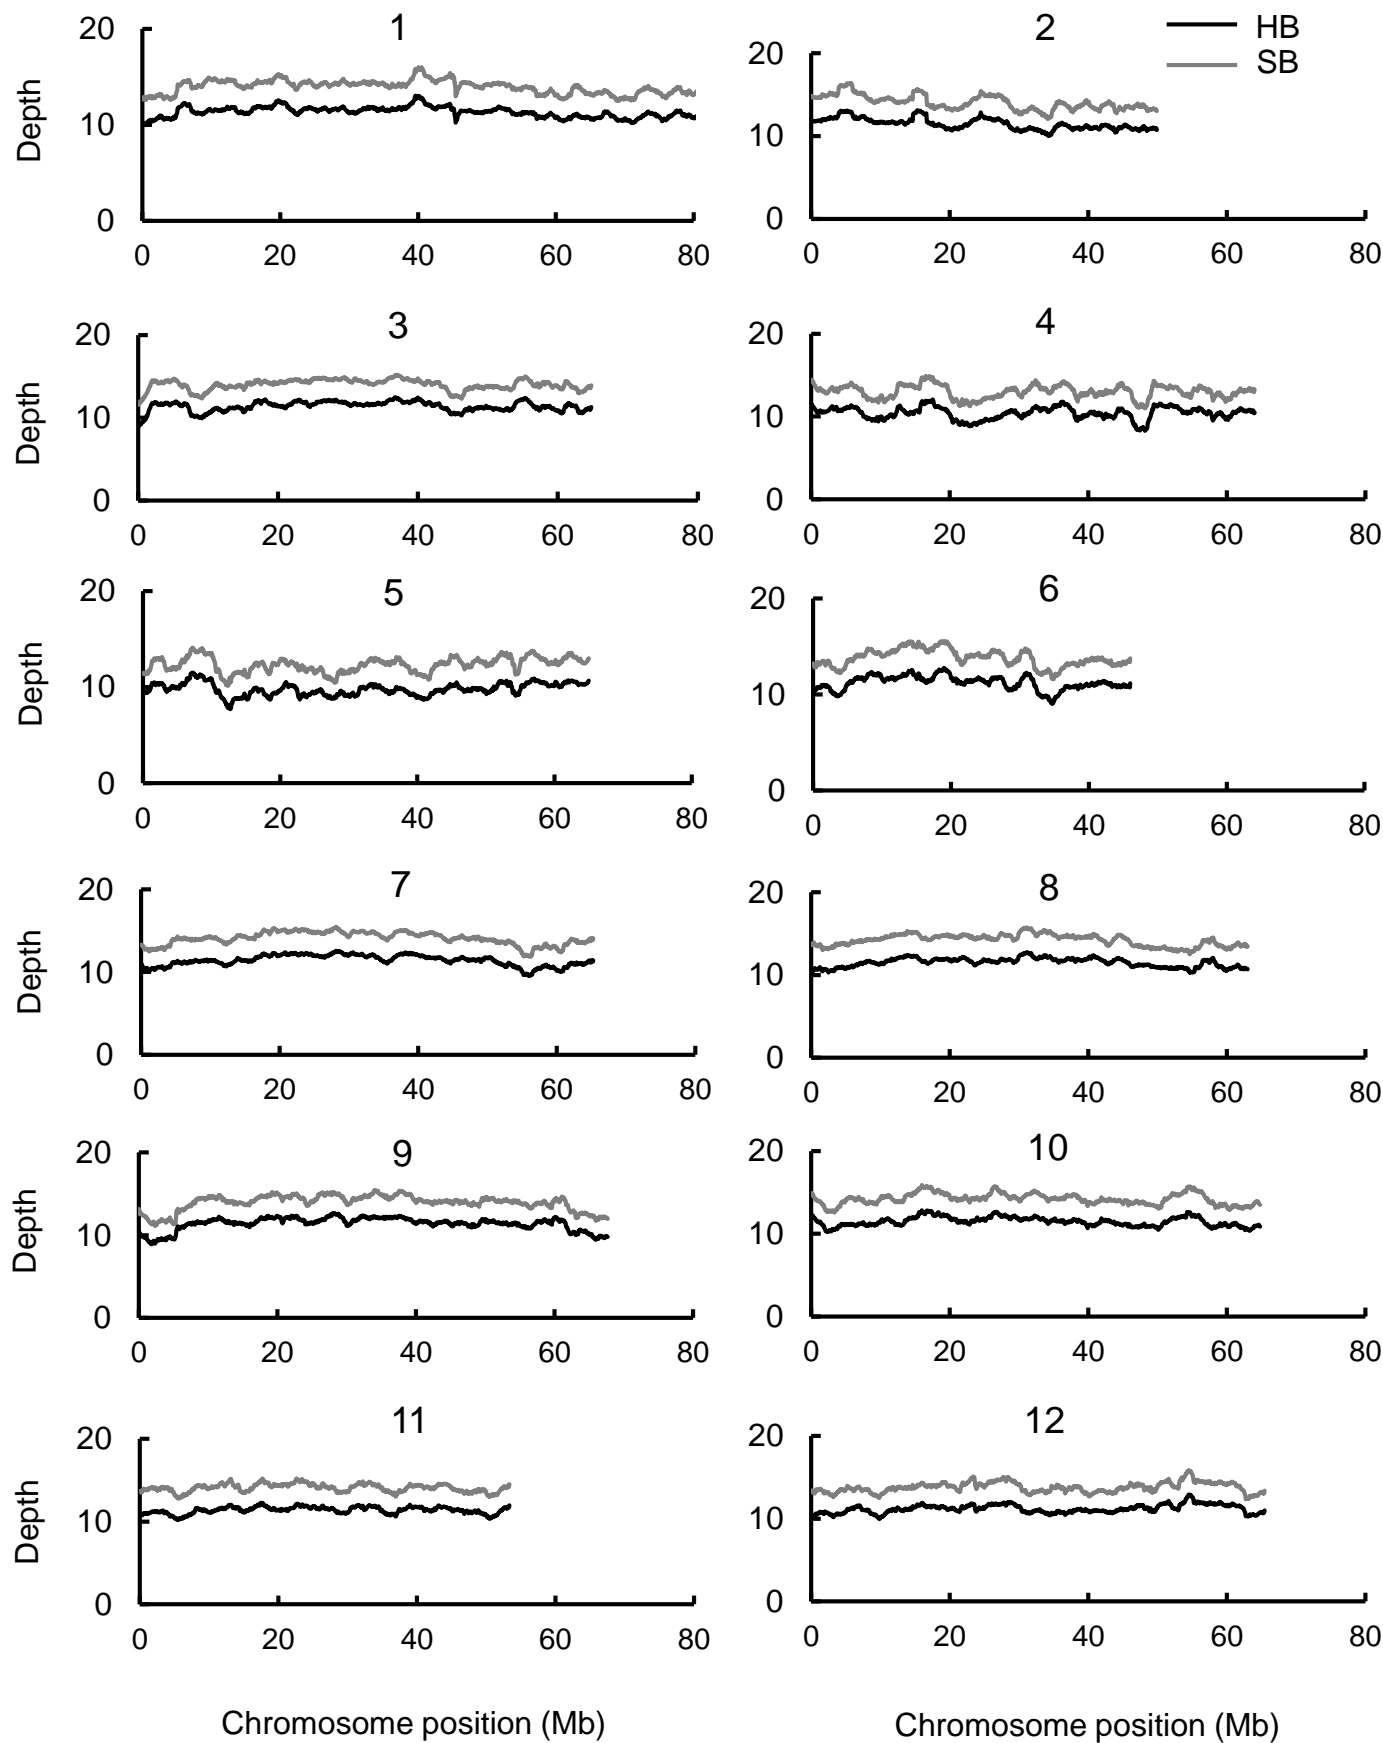

**Figure S1.** SNPs depth of whole genome. Dark line, depth of highly branched bulk (HB). Grey line, depth of single branch bulk (SB).

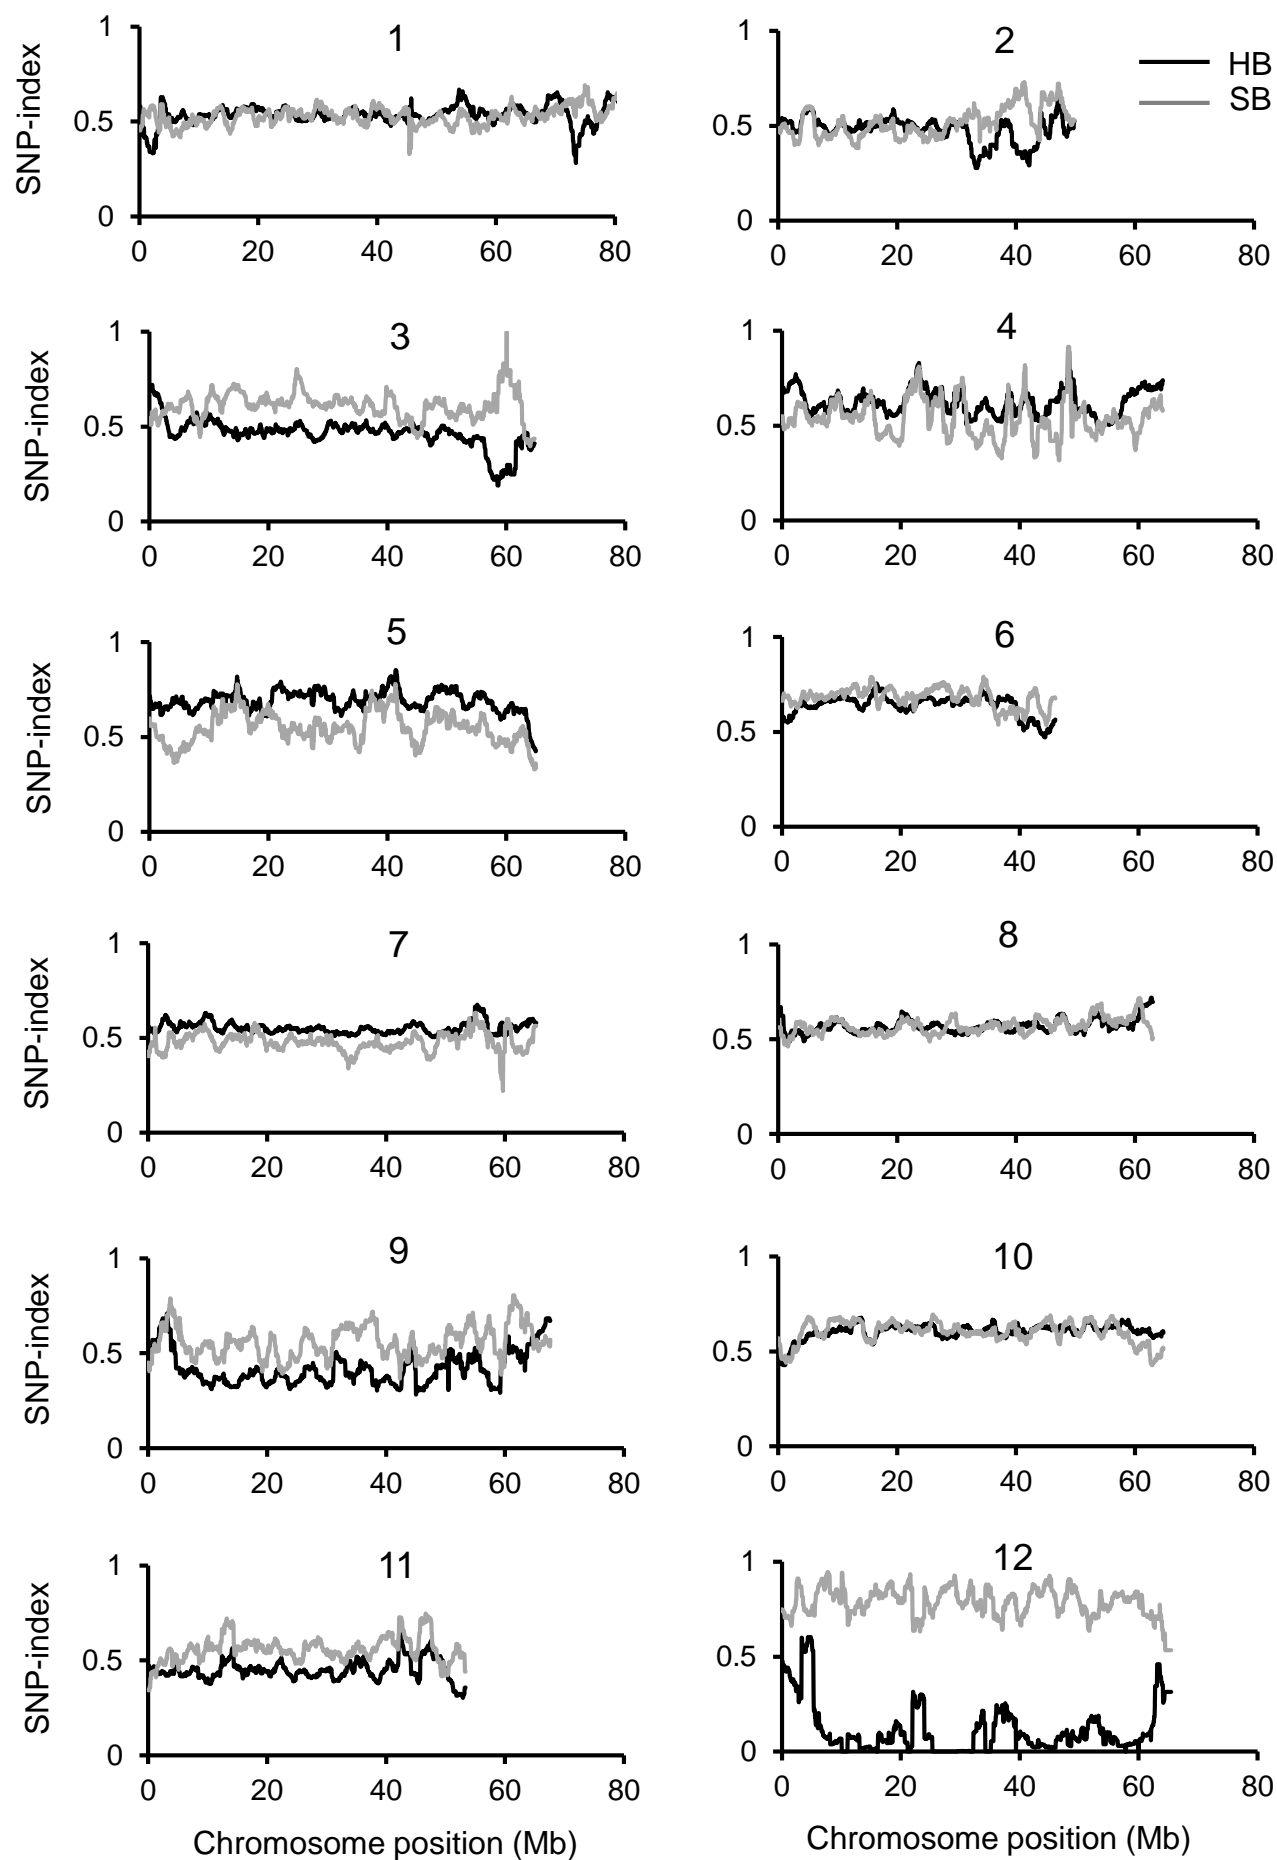

**Figure S2.** SNP-index graphs depict the single branch bulk (SB) and highly branched bulk (HB) generated from QTL-seq study. The X-axis denotes the physical positions (Mb) on tomato chromosomes. The Y-axis represents the SNP-index, which has been estimated for 2 Mb physical intervals with a 50 kb sliding window.

### FA gene's marker

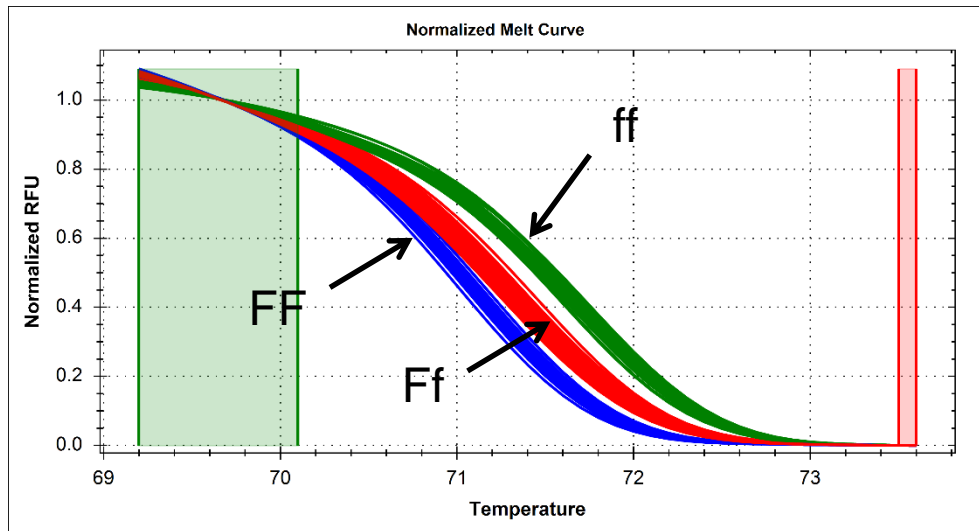

### S gene's marker

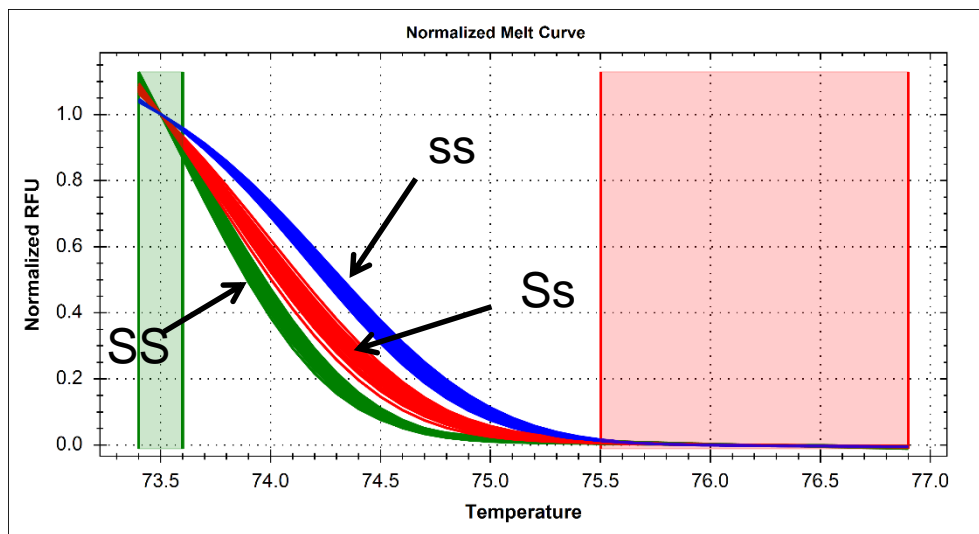

**Figure S3.** Genotyping of *FA* and *S* in  $F_2$  individuals by HRM analysis. *S/s* represents *S* gene marker; *F/f* represents *FA* gene marker. Three genotypic classes of *S* and *FA* genes: *SS/FF* alleles, homozygous, from PI124039; *ss/ff* alleles, homozygous, from 10AS111A; *Ss/Ff* alleles, heterozygous, from  $F_1$ .

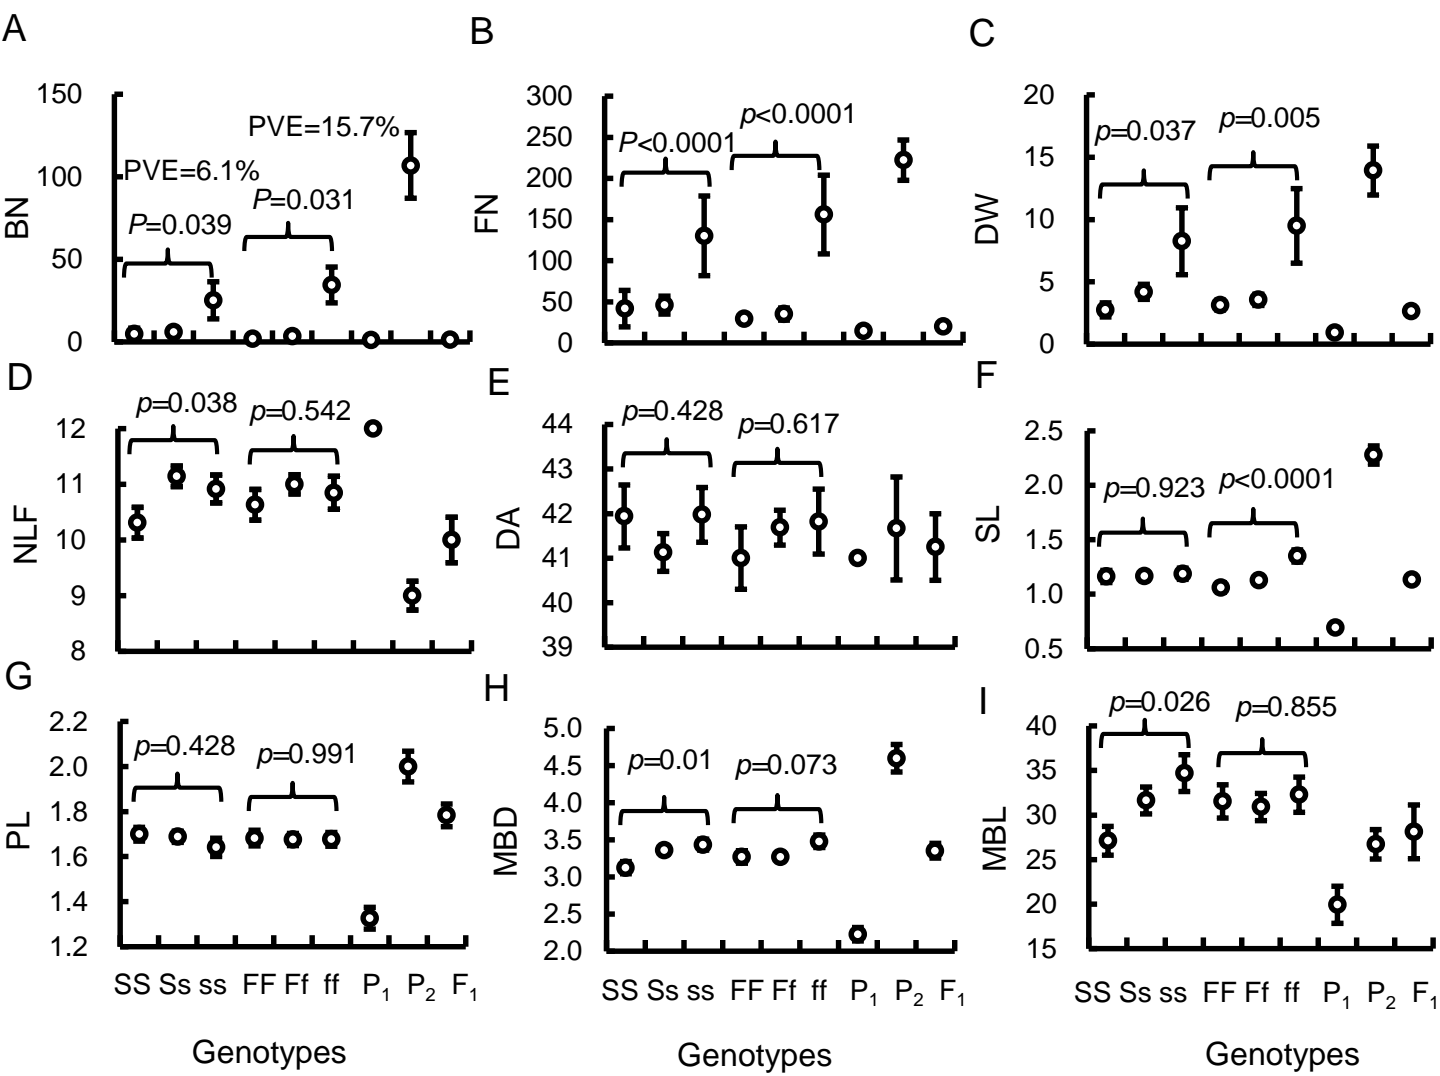

**Figure S4.** Quantitative effects associated with the *FA* and *S* genotypes. (A) The branch number per inflorescence (BN). (B) Flower number per inflorescence (FN). (C) Inflorescence dry weight (DW). (D) The number of leaves under the first inflorescence (NLF). (E) The days from sowing to the first flower anthesis (DA). (F) Floral trait, sepal length (SL). (G) Floral trait, petal length (PL). (H) The diameter of main inflorescence branch at the basal position (MBD). (I) The length of the main inflorescence branch (MBL). Trait values (mean ± SE) are plotted on the Y-axis of each graph, and genotypes with reference to *S* and *FA* in the parental lines and F<sub>1</sub> are plotted on the X-axis. The significance of variation in genotypes leading to variation in BN, FN, and DW was determined by Jonckheere-Terpstra test. Others traits and the  $p$  values for the associated ANOVA are also indicated. S/s represents *S* gene marker; F/f represents *FA* gene marker. Three genotypic classes of *S* and *FA* genes: SS/FF alleles, homozygous, from PI124039; ss/ff alleles, homozygous, from 10AS111A; Ss/Ff alleles, heterozygous, from F<sub>1</sub>. P<sub>1</sub>: *S. pimpinellifolium* PI124039; P<sub>2</sub>: *S. lycopersicum* 10AS111A; F<sub>1</sub>: the F<sub>1</sub> derived from P<sub>1</sub> and P<sub>2</sub>.

|                    |                                                                       |     |
|--------------------|-----------------------------------------------------------------------|-----|
| FA_wild type       | MDPDAFSASLFKWDPRGAMPPSRLLLEPVAPPQPPPSLPPPPPPQPLPTSSYSI RSTREL         | 60  |
| FA_strong mutation | MDPDAFSASLFKWDPRGAMPPSRLLLEPVAPPQPPPSLPPPPPPQPLPTSSYSI RSTREL         | 60  |
| FA_weak mutation   | MDPDAFSASLFKWDPRGAMPPSRLLLEPVAPPQPPPSLPPPPPPQPLPTSSYSI RSTREL         | 60  |
| FA_PI124039        | MDPDAFSASLFKWDPRGAMPPSRLLLEPVAPPQPPPSLPPPPPPQPLPTSSYSI RSTREL         | 60  |
| FA_10AS111A        | MDPDAFSASLFKWDPRGAMPPSRLLLEPVAPPQPPPSLPPPPPPQPLPTSSYSI RSTREL         | 60  |
|                    |                                                                       |     |
| FA_wild type       | GGLEELFQAYGI RYYTAAKI AELGFTVNTLLDMKDEELDDMNSLSQI FRWDL LVGERYG       | 120 |
| FA_strong mutation | GGLEELFQAYGI RYYTAAKI AELGFTVNTLLDMKDEELDDMNSLSQI FRWDL LVGERYG       | 120 |
| FA_weak mutation   | GGLEELFQAYGI RYYTAAKI AELGFTVNTLLDMKDEELDDMNSLSQI FRWDL LVGERYG       | 120 |
| FA_PI124039        | GGLEELFQAYGI RYYTAAKI AELGFTVNTLLDMKDEELDDMNSLSQI FRWDL LVGERYG       | 120 |
| FA_10AS111A        | GGLEELFQAYGI RYYTAAKI AELGFTVNTLLDMKDEELDDMNSLSQI FRWDL LVGERYG       | 120 |
|                    |                                                                       |     |
| FA_wild type       | I KAAI RAEWRRLEEEEEARRRGHI LSDGGTNVLDALS QE. GLSEEPVQQQHEREAAGSGGG    | 179 |
| FA_strong mutation | I KAAI RAEWRRLEEEEEARRRGHI LSDGGTNVLDALS QE. GLSEEPVQQQHER. . . . GGG | 174 |
| FA_weak mutation   | I KAAI RAEWRRLEEEEEARRRGHI LSDGGTNVLDALS QEVGLSEEPVQQQHEREAAGSGGG     | 180 |
| FA_PI124039        | I KAAI RAEWRRLEEEEEARRRGHI LSDGGTNVLDALS QE. GLSEEPVQQQHEREAAGSGGG    | 179 |
| FA_10AS111A        | I KAAI RAEWRRLEEEEEARRRGHI LSDGGTNVLDALS QE. GLSEEPVQQQQEREAAGSGGG    | 179 |
|                    |                                                                       |     |
| N-terminal domain  |                                                                       |     |
| FA_wild type       | GTWEVAAGGGGRMKQRRRKKAGRERRGEEDEETEELGEEDEENMNQGGGGGGI SERQREH         | 239 |
| FA_strong mutation | GTWEVAAGGGGRMKQRRRKKAGRERRGEEDEETEELGEEDEENMNQGGGGGGI SERQREH         | 234 |
| FA_weak mutation   | GTWEVAAGGGGRMKQRRRKKAGRERRGEEDEETEELGEEDEENMNQGGGGGGI SERQREH         | 240 |
| FA_PI124039        | GTWEVAAGGGGRMKQRRRKKAGRERRGEEDEETEELGEEDEENMNQGGGGGGI SERQREH         | 239 |
| FA_10AS111A        | GTWEVAAGGGGRMKQRRRKKAGRERRGEEDEETEELGEEDEENMNQGGGGGGI SERQREH         | 239 |
|                    |                                                                       |     |
| FA_wild type       | PFI VTEPGEVARGKKNGLDYLFHL YEQCRDFLI QVQTI AKERGEKCPTKVTNQVFRYAKK      | 299 |
| FA_strong mutation | PFI VTEPGEVARGKKNGLDYLFHL YEQCRDFLI QVQTI AKERGEKCPTKVTNQVFRYAKK      | 294 |
| FA_weak mutation   | PFI VTEPGEVARGKKNGLDYLFHL YEQCRDFLI QVQTI AKERGEKCPTKVTNQVFRYAKK      | 300 |
| FA_PI124039        | PFI VTEPGEVARGKKNGLDYLFHL YEQCRDFLI QVQTI AKERGEKCPTKVTNQVFRYAKK      | 299 |
| FA_10AS111A        | PFI VTEPGEVARGKKNGLDYLFHL YEQCRDFLI QVQTI AKERGEKCPTKVTNQVFRYAKK      | 299 |
|                    |                                                                       |     |
| FA_wild type       | AGAS YI NPKMRHYVHCYALHCLDEDAS NALRRAF KERGENVGAWRQACYKPLVAI AARQ      | 359 |
| FA_strong mutation | AGAS YI NPKMRHYVHCYALHCLDEDAS NALRRAF KERGENVGAWRQACYKPLVAI AARQ      | 354 |
| FA_weak mutation   | AGAS YI NPKMRHYVHCYALHCLDEDAS NALRRAF KERGENVGAWRQACYKPLVAI AARQ      | 360 |
| FA_PI124039        | AGAS YI NPKMRHYVHCYALHCLDEDAS NALRRAF KERGENVGAWRQACYKPLVAI AARQ      | 359 |
| FA_10AS111A        | AGAS YI NPKMRHYVHCYALHCLDEDAS NALRRAF KERGENVGAWRQACYKPLVAI AARQ      | 359 |
|                    |                                                                       |     |
| FA_wild type       | GWDI DAI FNAHPRLAI WYVPTKLRLCHSERS NAAAAASSS VS GGVADHLP H            | 411 |
| FA_strong mutation | GWDI DAI FNAHPRLAI WYVPTKLRLCHSERS NAAAAASSS VS GGVADHLP H            | 406 |
| FA_weak mutation   | GWDI DAI FNAHPRLAI WYVPTKLRLCHSERS NAAAAASSS VS GGVADHLP H            | 412 |
| FA_PI124039        | GWDI DAI FNAHPRLAI WYVPTKLRLCHSERS NAAAAASSS VS GGVADHLP H            | 411 |
| FA_10AS111A        | GWDI DAI FNAHPRLAI WYVPTKLRLCHSERS NAAAAASSS VS GGVADHLP H            | 411 |
|                    |                                                                       |     |
| DNA binding domain |                                                                       |     |

**Figure S5.** Comparison of the FA alleles. Different amino acids are shaded in black and indicated by red arrows. The domains are indicated below the alignment by red line. FA\_wild type= *Solanum lycopersicum* Mill. FALSIFLORA (GenBank accession number AF197936).

|                   |                                                                                   |     |
|-------------------|-----------------------------------------------------------------------------------|-----|
| S                 | MASSNRHWPSMFKSKPCNSHHHQWQHDI NSSI I QQRPPCNPEERSPEPKPRWNP RP EQI R                | 60  |
| S_CLASSIC         | MASSNRHWPSMFKSKPCNSHHHQWQHDI NSSI I QQRPPCNPEERSPEPKPRWNP RP EQI R                | 60  |
| S_MULT            | MASSNRHWPSMFKSKPCNSHHHQWQHDI NSSI I QQRPPCNPEERSPEPKPRWNP RP EQI R                | 60  |
| S_PI124039        | MASSNRHWPSMFKSKPCNSHHHQWQHDI NSSI I QQRPPCNPEERSPEPKPRWNP RP EQI R                | 60  |
| S_10AS111A        | MASSNRHWPSMFKSKPCNSHHHQWQHDI NSSI I QQRPPCNPEERSPEPKPRWNP RP EQI R                | 60  |
|                   |                                                                                   |     |
| S                 | I LEAI FNS <b>G</b> MVNPPRDEI RK <b>I</b> RAKLQEYGVGDANVF YWFQNRKSRSKHKQRHLQAKAQQ | 120 |
| S_CLASSIC         | I LEAI FNS <b>D</b> MVNPPRDEI RK <b>I</b> RAKLQEYGVGDANVF YWFQNRKSRSKHKQRHLQAKAQQ | 120 |
| S_MULT            | I LEAI FNS <b>G</b> MVNPPRDEI RK <b>F</b> RAKLQEYGVGDANVF YWFQNRKSRSKHKQRHLQAKAQQ | 120 |
| S_PI124039        | I LEAI FNS <b>G</b> MVNPPRDEI RK <b>I</b> RAKLQEYGVGDANVF YWFQNRKSRSKHKQRHLQAKAQQ | 120 |
| S_10AS111A        | I LEAI FNS <b>G</b> MVNPPRDEI RK <b>I</b> RAKLQEYGVGDANVF YWFQNRKSRSKHKQRHLQAKAQQ | 120 |
|                   |                                                                                   |     |
| Homeodomain       |                                                                                   |     |
| S                 | QHHNNNNNS SHQPI I TSSSSSSDKSSPNSLTFSI GTSNVMDLLNSPTSSVNQQNYNEFLS                  | 180 |
| S_CLASSIC         | QHHNNNNNS SHQPI I TSSSSSSDKSSPNSLTFSI GTSNVMDLLNSPTSSVNQQNYNEFLS                  | 180 |
| S_MULT            | QHHNNNNNS SHQPI I TSSSSSSDKSSPNSLTFSI GTSNVMDLLNSPTSSVNQQNYNEFLS                  | 180 |
| S_PI124039        | QHHNNNNNS SHQPI I TSSSSSSDKSSPNSLTFSI GTSNVMDLLNSPTSSVNQQNYNEFLS                  | 180 |
| S_10AS111A        | QHHNNNNNS SHQPI I TSSSSSSDKSSPNSLTFSI GTSNVMDLLNSPTSSVNQQNYNEFLS                  | 180 |
|                   |                                                                                   |     |
| S                 | NEQPFFFTVQPPP <b>V</b> MPTHDHS AGFCFQDSSFTTPHSSSSGLLLNEWMGGI STQAPNNSKK           | 240 |
| S_CLASSIC         | NEQPFFFTVQPPP <b>V</b> MPTHDHS AGFCFQDSSFTTPHSSSSGLLLNEWMGGI STQAPNNSKK           | 240 |
| S_MULT            | NEQPFFFTVQPPP <b>V</b> MPTHDHS AGFCFQDSSFTTPHSSSSGLLLNEWMGGI STQAPNNSKK           | 240 |
| S_PI124039        | NEQPFFFTVQPPP <b>V</b> MPTHDHS AGFCFQDSSFTTPHSSSSGLLLNEWMGGI STQAPNNSKK           | 240 |
| S_10AS111A        | NEQPFFFTVQPPP <b>V</b> EPTHDHS AGFCFQDSSFTTPHSSSSGLLLNEWMGGI STQAPNNSKK           | 240 |
|                   |                                                                                   |     |
| S                 | DENDKI NLQS QLMS YTVTSTVSPLATTTI PTI SHI QGVTVDPNDAGPTRSTVFI NDVAFE               | 300 |
| S_CLASSIC         | DENDKI NLQS QLMS YTVTSTVSPLATTTI PTI SHI QGVTVDPNDAGPTRSTVFI NDVAFE               | 300 |
| S_MULT            | DENDKI NLQS QLMS YTVTSTVSPLATTTI PTI SHI QGVTVDPNDAGPTRSTVFI NDVAFE               | 300 |
| S_PI124039        | DENDKI NLQS QLMS YTVTSTVSPLATTTI PTI SHI QGVTVDPNDAGPTRSTVFI NDVAFE               | 300 |
| S_10AS111A        | DENDKI NLQS QLMS YTVTSTVSPLATTTI PTI SHI QGVTVDPNDAGPTRSTVFI NDVAFE               | 300 |
|                   |                                                                                   |     |
| S                 | VGI GPFNVREVFGEDAVLI HSSGEPLI TNEWGI TI QPLQHGAFFYLLRTSSI ASTHH                   | 357 |
| S_CLASSIC         | VGI GPFNVREVFGEDAVLI HSSGEPLI TNEWGI TI QPLQHGAFFYLLRTSSI ASTHH                   | 357 |
| S_MULT            | VGI GPFNVREVFGEDAVLI HSSGEPLI TNEWGI TI QPLQHGAFFYLLRTSSI ASTHH                   | 357 |
| S_PI124039        | VGI GPFNVREVFGEDAVLI HSSGEPLI TNEWGI TI QPLQHGAFFYLLRTSSI ASTHH                   | 357 |
| S_10AS111A        | VGI GPFNVREVFGEDAVLI HSSGEPLI TNEWGI TI QPLQHGAFFYLLRTSSI ASTHH                   | 357 |
|                   |                                                                                   |     |
| C-terminal domain |                                                                                   |     |

**Figure S6.** Comparison of the S alleles. Different amino acids are shaded in black and indicated by red arrows. The domains are indicated below the alignment by red line. S= *Solanum lycopersicum* COMPOUND INFLORESCENCE (GenBank accession number NP\_001234072).
